# Supplementary material
Source: PubMed Central journal article supplement (PMC8544417)
Supplement: jb.00265-21-s0001.pdf [file jb.00265-21-s0001.pdf]

## Supplemental Figure

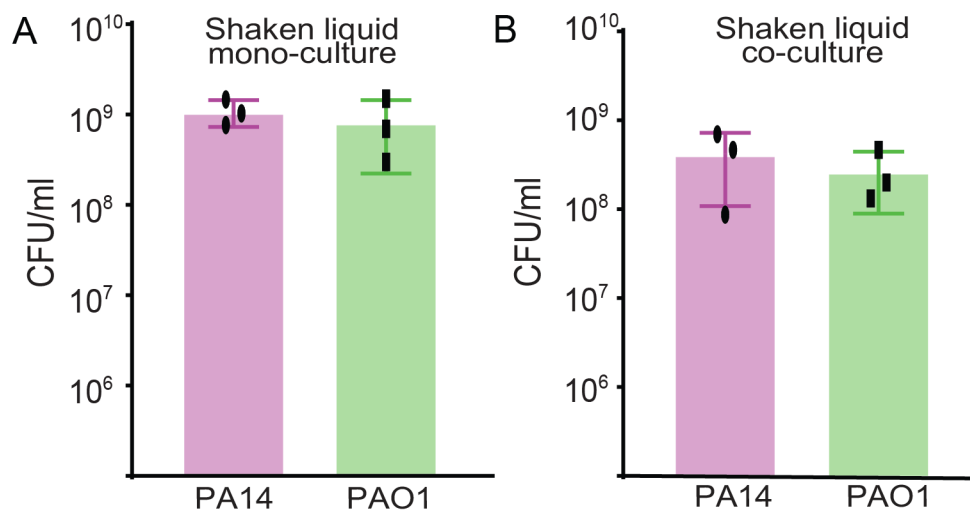

**Figure S1. Well-mixed liquid culture growth comparison of PA14 and PAO1 in monoculture and co-culture.** PA14 and PAO1 were back-diluted 1:10 from overnight cultures and allowed to regrow into exponential phase for 3 hr prior to being back-diluted once again to  $OD_{600} = 0.05$  either on their own (A) or together at a 1:1 starting ratio (B). Population size in stationary phase was measured by colony-forming unit (CFU) count.  $n = 3$ ; error bars denote the standard deviation. PAO1 and PA14 were not significantly different from each other in mono-culture or co-culture by 2-way ANOVA with a Sidak post-test.

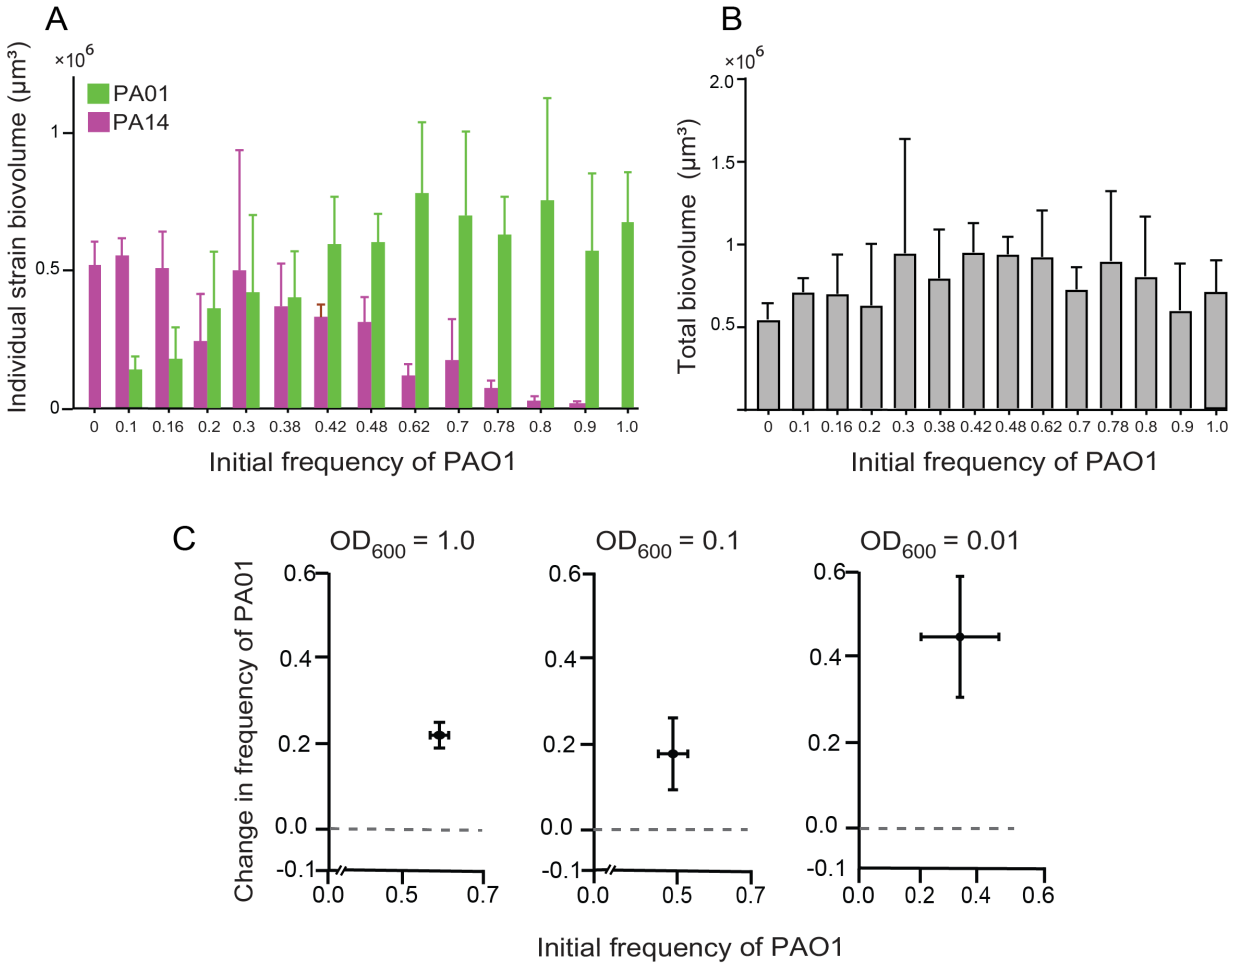

**Figure S2. Absolute growth rate dynamics in biofilm co-cultures of PA14 and PAO1, and tests for density-dependence of the PAO1 biofilm competitive advantage.** (A) The biovolume accumulation of PA14 and PAO1 in co-culture from a full spectrum of initial frequencies of the two strains. (B) The total biovolume of both strains from each initial condition in (A). Data from (A) and (B) are the same as those from Figure 1G of the main text, visualized in a different way.  $n = 9$  non-overlapping image stacks from 4 separate microfluidic chambers. Error bars denote the standard deviation. (C) Competition between PA14 and PAO1 from approximately 1:1 initial inoculation at three different initial culture densities used for inoculation. For each inoculation density,  $n = 9$  non-overlapping image stacks from 4 separate microfluidic chambers; error bars denote the standard deviation.

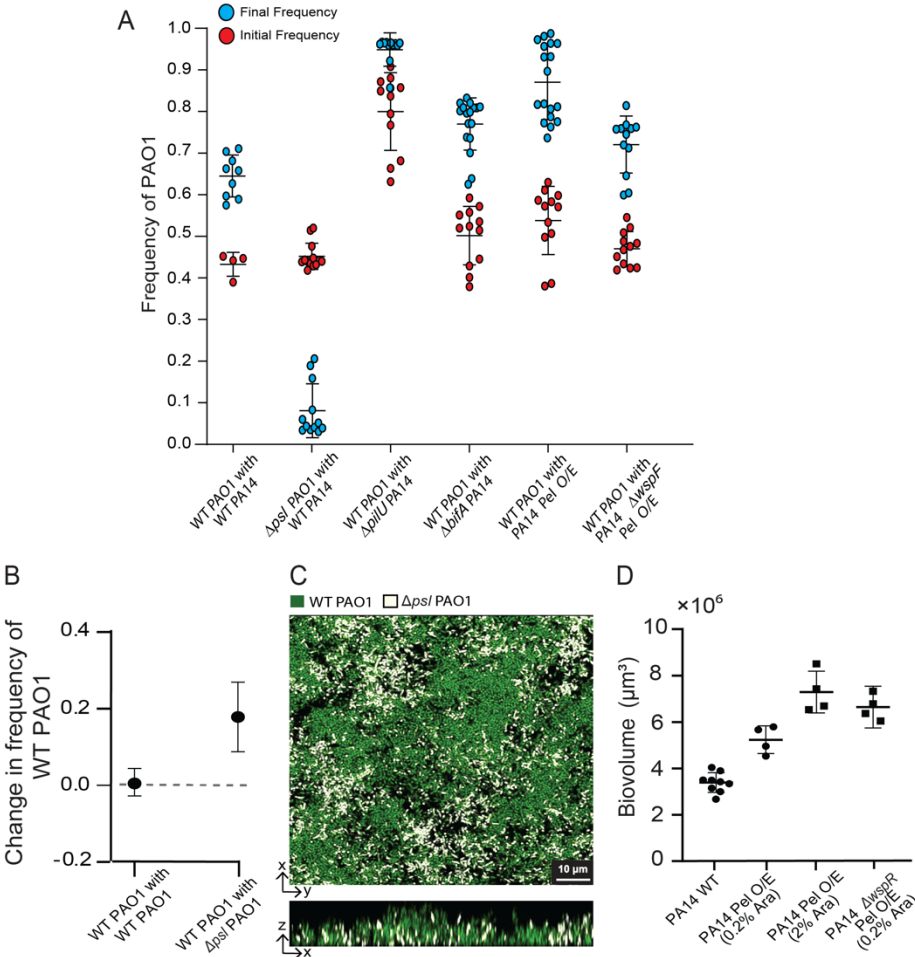

28

29 **Figure S3. Control biofilm competition experiments with strain PAO1 and Pel over-**  
30 **expression strains of PA14. (A)** Absolute initial and final frequencies of PAO1 (and in once case  
31 PAO1  $\Delta$ psl) against PA14 and isogenic strains with altered piliation or matrix production. The  
32 change-in-frequency data in Figure 2 are derived from the final and initial frequencies displayed  
33 in this panel.  $n = 9$ -18 non-overlapping image stacks from 4-6 separate microfluidic chambers;  
34 error bars denote the standard deviation. **(B,C)** Biofilm competition of PAO1 against itself and  
35 against a PAO1 mutant with reduced Psl production.  $n = 4$ -9 non-overlapping image stacks from  
36 2-4 separate microfluidic chambers; error bars denote the standard deviation. **(D)** Biofilm  
37 production of PA14 WT in mono-culture and in three strain backgrounds with augmented Pel  
38 production by overexpression in trans for Pel, or with the *wspR* deletion.  $n = 4$ -9 non-overlapping  
39 image stacks from 2-4 separate microfluidic chambers; error bars denote the standard deviation.

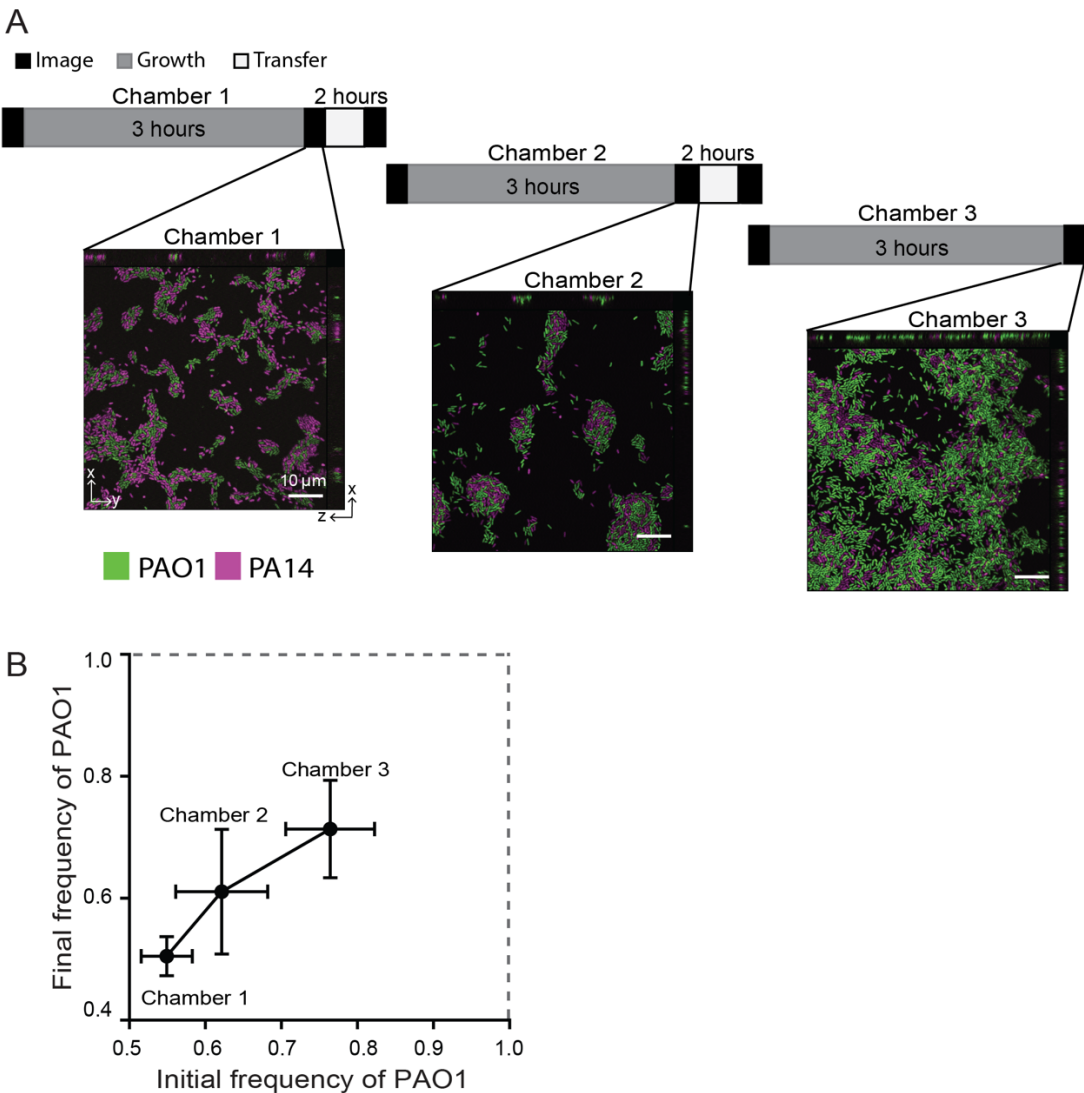

41

42

43

44

45

46

47

48

49

50

51

**Figure S4. PAO1 outcompetes PA14 in a high-frequency dispersal regime.** (A) Graphical summary of dispersal experiment regime (top) and representative images of biofilms in serially inoculated chambers (bottom). (B) The frequency of PAO1 in dispersal experiments through serially inoculated chambers with intervening 3 hr incubations. All error bars denote standard deviation ( $n = 9$  non-overlapping image stacks from 4 separate microfluidic chambers). Population densities exiting the 3 hr-incubated biofilm chambers were too low to consistently colonize subsequent chambers with sufficient surface coverage. To adjust for this effect, the final frequencies of each strain in chambers following their 3 hr incubation were used to seed downstream chambers, but at higher cell density to obtain sufficient surface coverage for seeding the next chamber's biofilm growth.

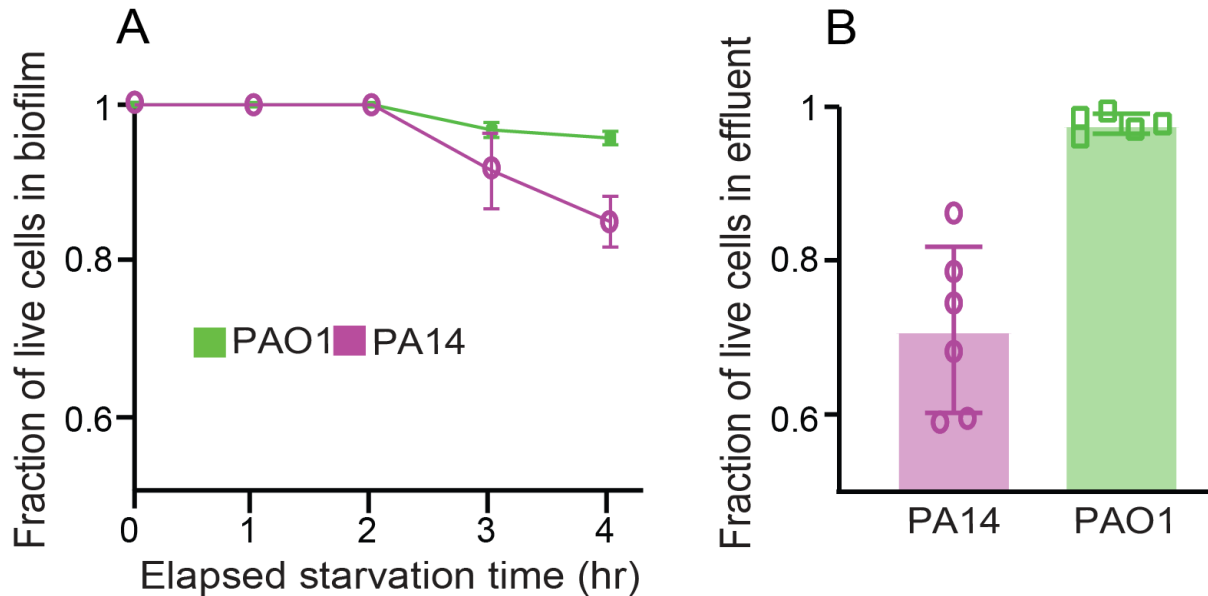

**Figure S5. Tracking cell death following carbon starvation in growing biofilms and dispersed cells in the effluent liquid phase.** Biofilms inoculated with a 1:1 mixture of *P. aeruginosa* PAO1 and PA14 were incubated for 24 h under constant flow, after which the inflow tubing was switched to a new syringe containing carbon-free medium and propidium iodide (2 $\mu$ g/mL) at room temperature. The biofilms were imaged 1/hr for 4 hr, and effluent from these chambers was collected continuously into chilled storage tubes, from which samples were taken for imaging at the end of the experiment. **(A)** The frequency of living PA14 and PAO1 cells (cell with zero propidium iodide staining) within biofilms undergoing carbon starvation for 4 hr.  $n = 6$  non-overlapping image stacks from 3 separate microfluidic chambers. Error bars denote the standard deviation. **(B)** The fraction of living PA14 and PAO1 cells in the effluent collected over 4 hr of carbon starvation. Effluent was collected separately for  $n = 6$  independent microfluidic chambers; error bars denote the standard deviation.
